# Supplementary material
Source: PubMed Central journal article supplement (PMC4177037)

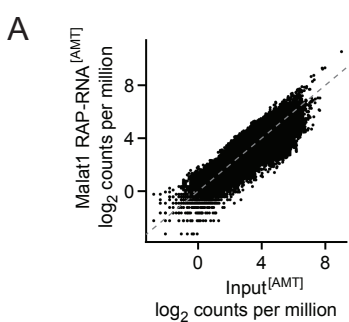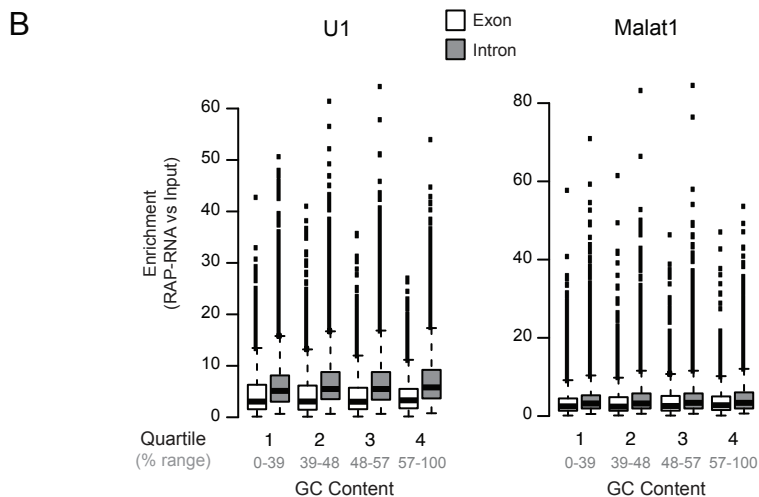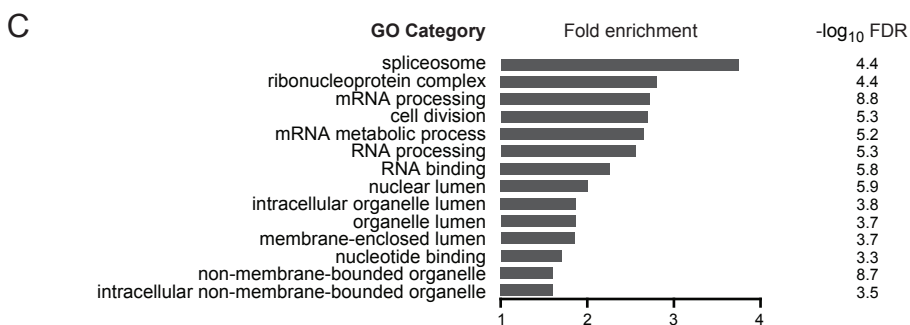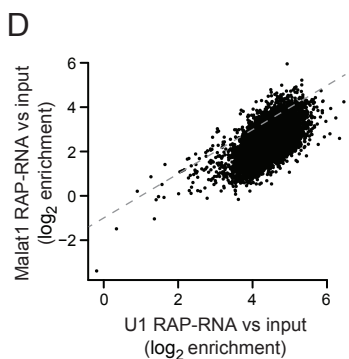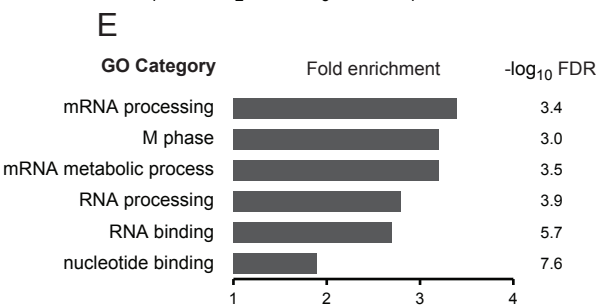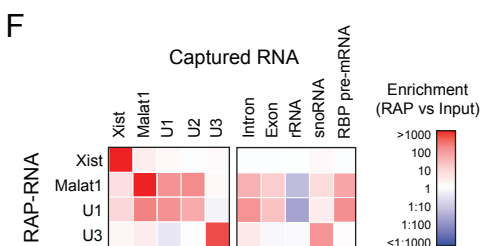

Supplement: NIHMS625961-supplement-4.pdf [file NIHMS625961-supplement-4.pdf]

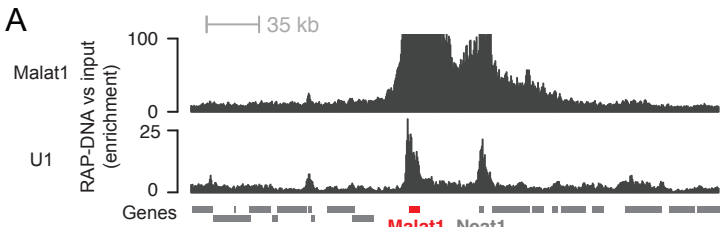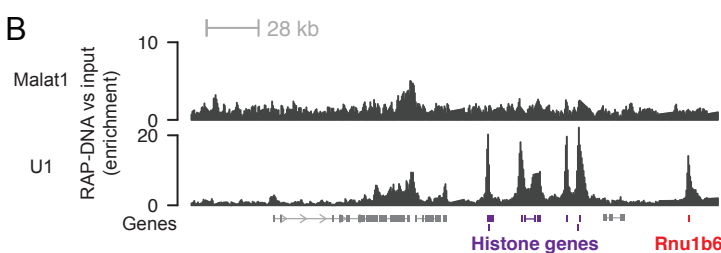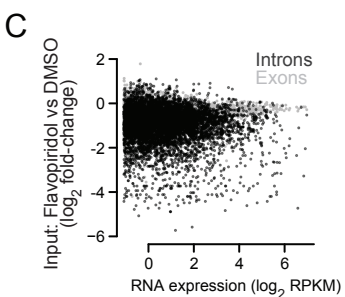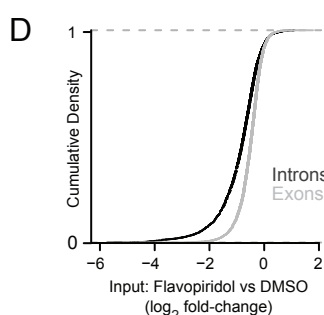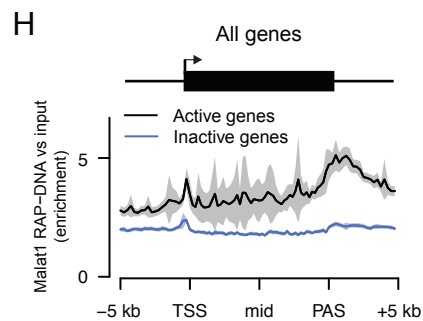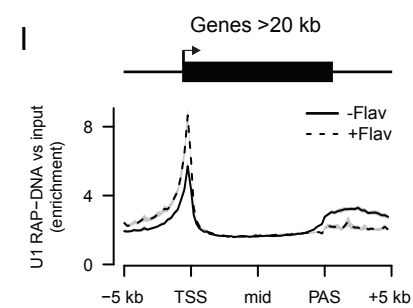

**J** DMSO

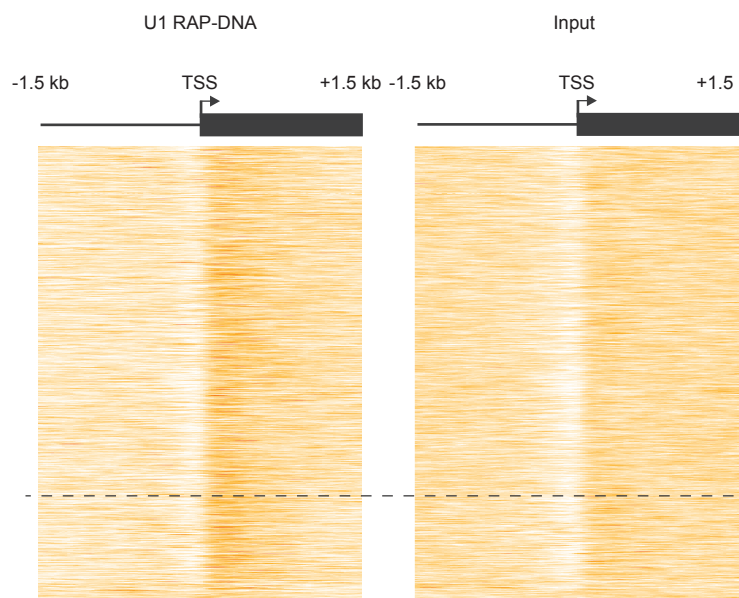

**K** Flavopiridol

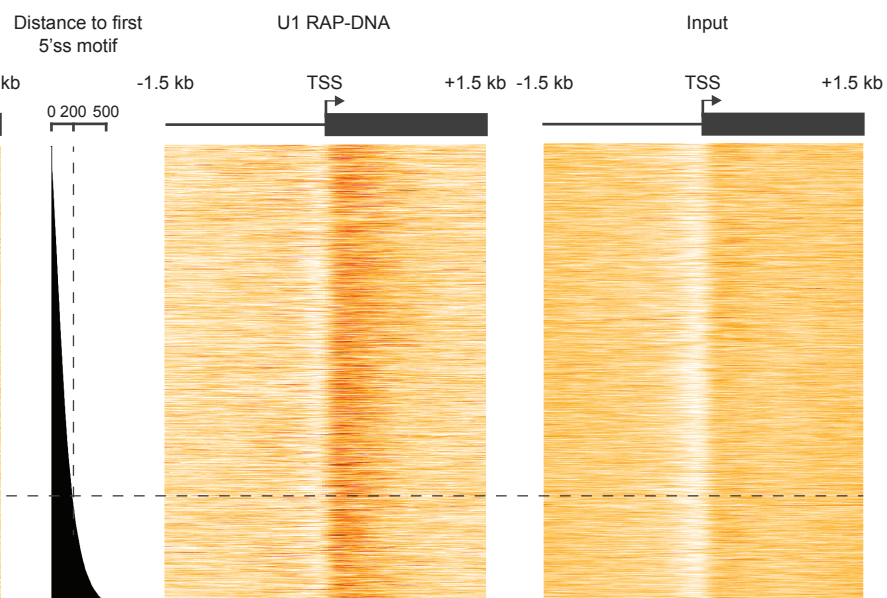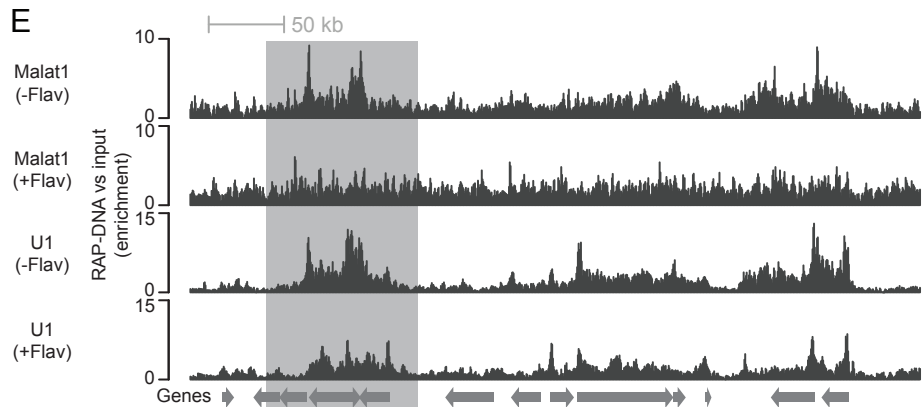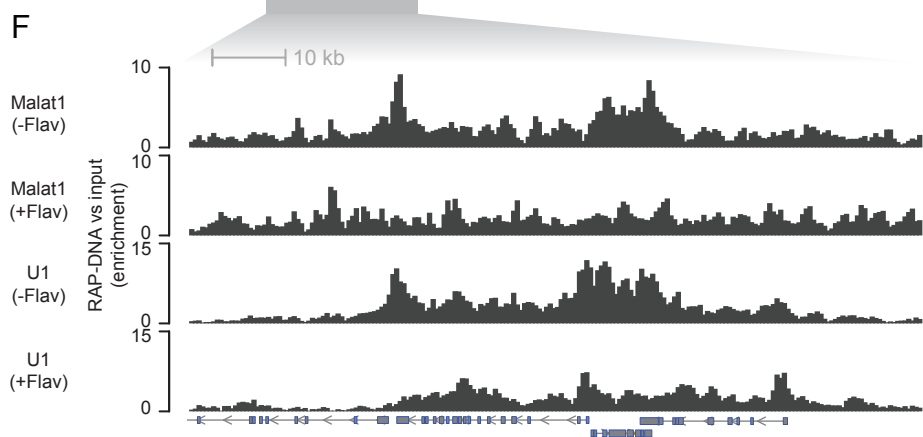

**G**

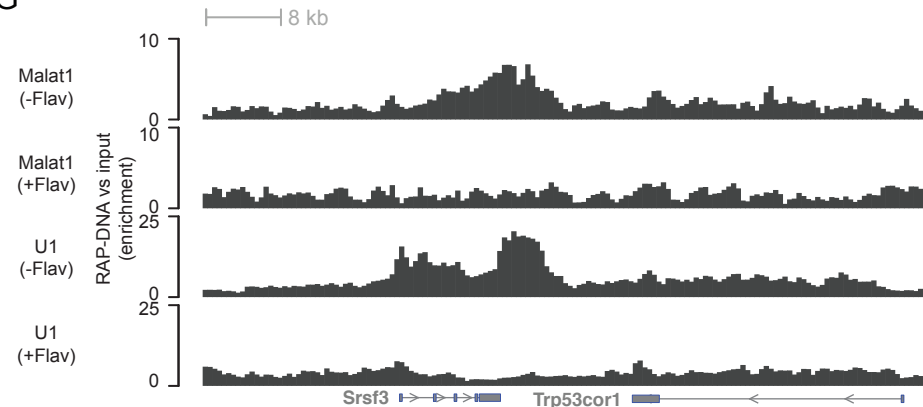

Supplement: NIHMS625961-supplement-5.pdf [file NIHMS625961-supplement-5.pdf]
